# Supplementary material for: Ti3C2Tx (MXene)/Pt nanoparticle electrode for the accurate detection of DA coexisting with AA and UA
Source: Royal Society of Chemistry journal article supplement (doi:10.1039/d2dt00110a), 2022-01-01
Supplement: d2dt00110a1.pdf [file d2dt00110a1.pdf]

## Supplementary Information

### **Ti<sub>3</sub>C<sub>2</sub>T<sub>x</sub> (MXene)/Pt nanoparticles electrode for accurate detection of DA coexisting with AA and UA**

You Xue <sup>a</sup>, Yapeng Zheng <sup>a</sup>, Enhui Wang <sup>a</sup>, Tao Yang <sup>a,\*</sup>, Hongyang Wang <sup>b,\*</sup>, Xinmei Hou <sup>a,\*</sup>

<sup>a</sup> *Beijing Advanced Innovation Center for Materials Genome Engineering, Collaborative Innovation Center of Steel Technology, University of Science and Technology Beijing, Beijing 100083, China*

<sup>b</sup> *State Key Laboratory of Environmental Criteria and Risk Assessment, Chinese Research Academy of Environmental Sciences, Beijing 100012, China*

\*Corresponding author.

Email: [houxinmeiustb@ustb.edu.cn](mailto:houxinmeiustb@ustb.edu.cn) (Xinmei Hou)

[yangtaoustb@ustb.edu.cn](mailto:yangtaoustb@ustb.edu.cn) (Tao Yang)

[wanghongyang\\_why@126.com](mailto:wanghongyang_why@126.com) (Hongyang Wang)

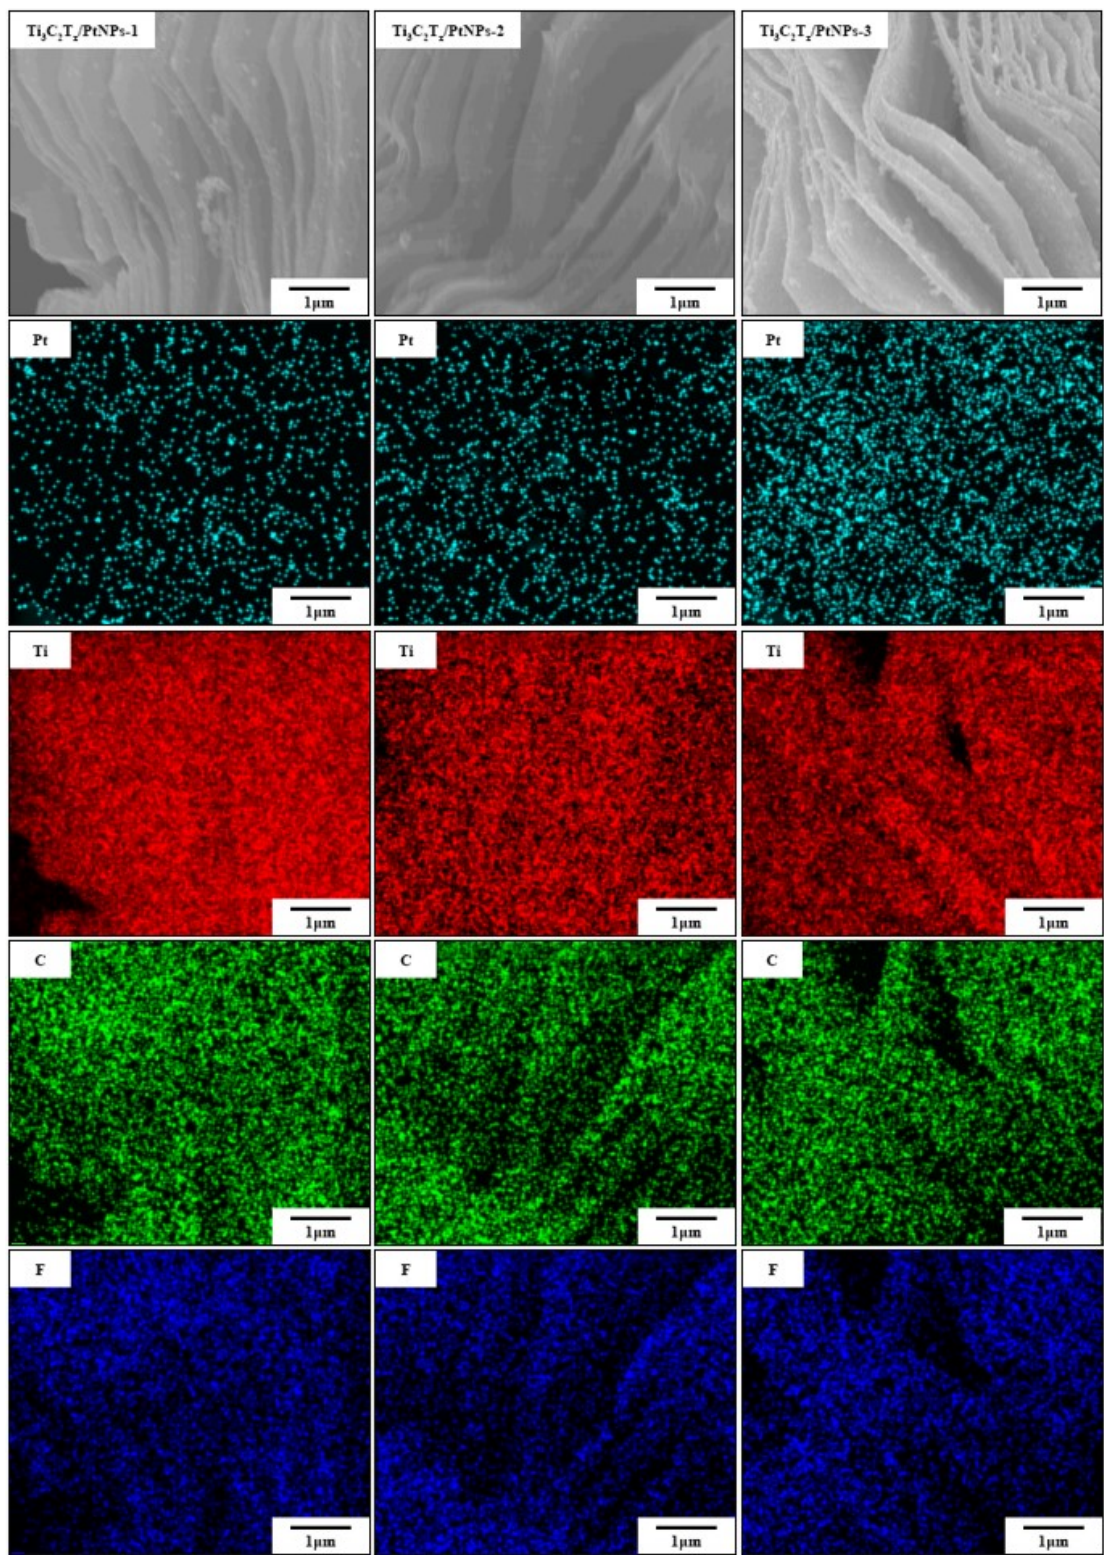

Fig. S1 The corresponding elemental mapping images of sample.

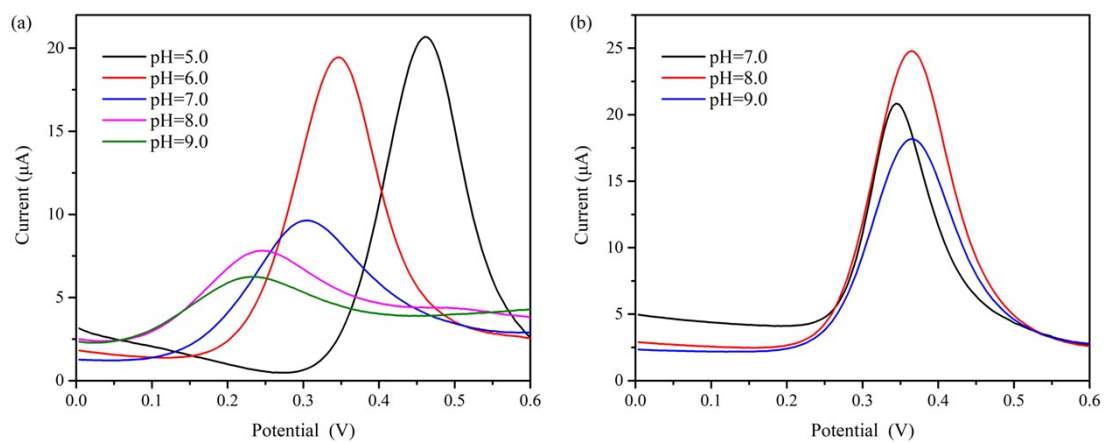

**Fig. S2** The DPV curves of  $\text{Ti}_3\text{C}_2\text{T}_x/\text{PtNPs-2}/\text{GCE}$  in 1 mM DA (a) and 1 mM UA (b) in 0.1 M PBS

with various pH.

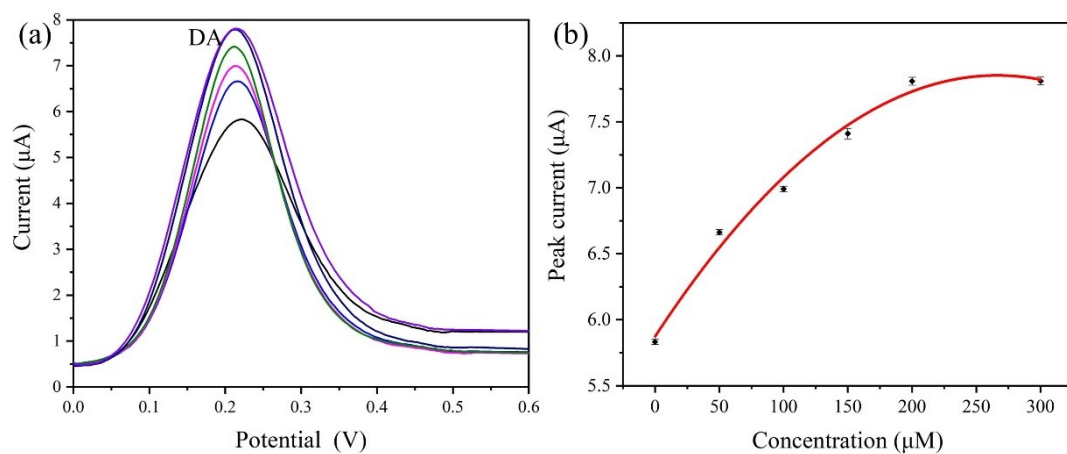

**Fig. S3** The DPV curves of 100 μM DA in the presence of different AA (0, 20, 50, 100, 150, 200, 300 μM)(a). The fitting plot of oxidation peak current with different concentration of AA(b).

**Table S1** Performances of different sensors for electrochemical detection of DA.

| Electrode                                                | LOD ( $\mu\text{M}$ ) | Linear range ( $\mu\text{M}$ ) | Refs.     |
|----------------------------------------------------------|-----------------------|--------------------------------|-----------|
| Pd Pt/RGO/GCE                                            | 0.04                  | 4-200                          | 1         |
| TiN-rGO/GCE                                              | 0.159                 | 5-175                          | 2         |
| Reduced graphene oxide -ZnO                              | 1.08                  | 3-330                          | 3         |
| AuNPs@GO/PPy/CFP                                         | 0.115                 | 0.2-60                         | 4         |
| Screen-printed Graphene electrode                        | 0.12                  | 0.5-2000                       | 5         |
| Glass Carbon/Pt                                          | 0.03                  | 0.03-8.1                       | 6         |
| Au/RGO/GCE                                               | 1.4                   | 6.8-41                         | 7         |
| RGO-CNT-Au/GCE                                           | 3.3                   | 100-320                        | 8         |
| Ti <sub>3</sub> C <sub>2</sub> T <sub>x</sub> /GCE       | 0.06                  | 0.5-50                         | 9         |
| Ti <sub>3</sub> C <sub>2</sub> T <sub>x</sub> /PtNPs/GCE | 0.48/0.38             | 5-180                          | This work |

**Table S2** Determination results of DA in real sample.

| Sample | Initial solution<br>( $\mu\text{mol/L}$ ) | Added DA<br>( $\mu\text{mol/L}$ ) | Found DA<br>( $\mu\text{mol/L}$ ) | Calibrated DA<br>( $\mu\text{mol/L}$ ) | Recovery<br>(%) | RSD<br>(%, n=3) |
|--------|-------------------------------------------|-----------------------------------|-----------------------------------|----------------------------------------|-----------------|-----------------|
| 1      | 100 AA                                    | 20                                | 24                                | 19                                     | 99.1            | 3.7             |
| 2      | 100 AA                                    | 40                                | 44                                | 40                                     | 100.0           | 1.5             |
| 3      | 100 AA                                    | 60                                | 65                                | 61                                     | 101.3           | 2.2             |
| 4      | Urine (46 AA)                             | 20                                | 21                                | 20                                     | 100.0           | 2.7             |
| 5      | Urine (58 AA)                             | 40                                | 41                                | 41                                     | 103.3           | 2.4             |
| 6      | Urine (70 AA)                             | 60                                | 62                                | 61                                     | 101.4           | 1.9             |

- 1 J. Yan, S. Liu, Z. Zhang, G. He, P. Zhou, H. Liang, L. Tian, X. Zhou and H. Jiang, *Colloids Surf. , B* 2013, **111**, 392-397.
- 2 J. Feng, Q. Li, J. Cai, T. Yang, J. Chen and X. Hou, *Sensors and Actuators, B: Chemical*, 2019, **298**, 126872.
- 3 X. Zhang, Y.-C. Zhang and L.-X. Ma, *Sens. Actuators, B*, 2016, **227**, 488-496.
- 4 C. Tan, J. Zhao, P. Sun, W. Zheng and G. Cui, *New J. Chem.*, 2020, **44**, 4916-4926.
- 5 J. Ping, J. Wu, Y. Wang and Y. Ying, *Biosens. Bioelectron.*, 2012, **34**, 70-76.
- 6 C. L. Sun, H. H. Lee, J. M. Yang and C. C. Wu, *Biosens. Bioelectron.*, 2011, **26**, 3450-3455.
- 7 C. Wang, J. Du, H. Wang, C. e. Zou, F. Jiang, P. Yang and Y. Du, *Sens. Actuators, B*, 2014, **204**, 302-309.
- 8 S. Wang, W. Zhang, X. Zhong, Y. Chai and R. Yuan, *Anal. Methods*, 2015, **7**, 1471-1477.
- 9 N. Murugan, R. Jerome, M. Preethika, A. Sundaramurthy and A. K. Sundramoorthy, *J. Mater. Sci. Technol.*, 2021, **72**, 122-131.
